# Supplementary material for: Parental Age and Childhood Lymphoma and Solid Tumor Risk: A Literature Review and Meta-Analysis
Source: PubMed Central journal article supplement — JNCI Cancer Spectr. 2022 May 27;6(3):pkac040. doi: 10.1093/jncics/pkac040 (PMC9237841; doi:10.1093/jncics/pkac040), 2022-05-27
Supplement: pkac040_supplementary_data.pdf [file pkac040_supplementary_data.pdf]

# Supplementary Material

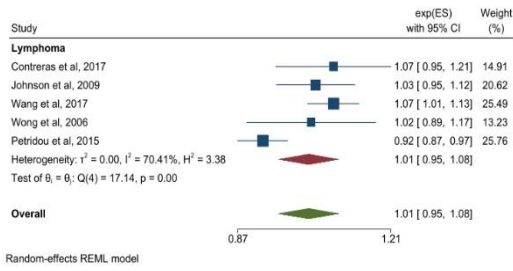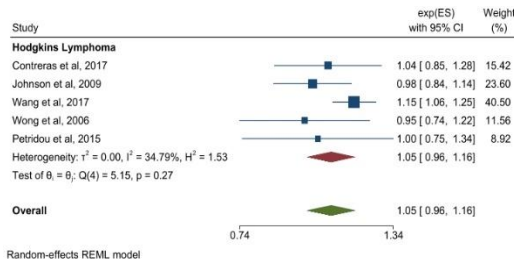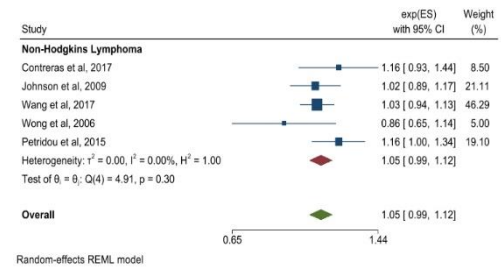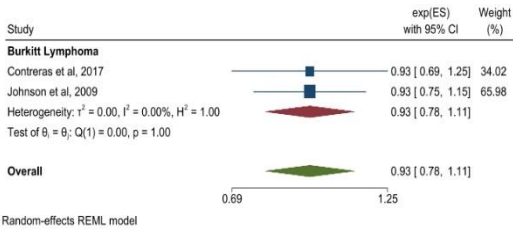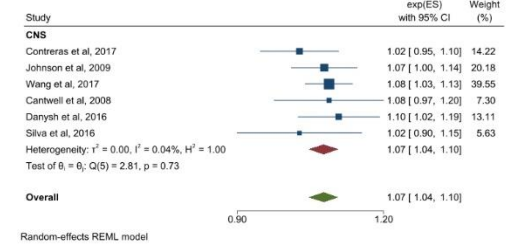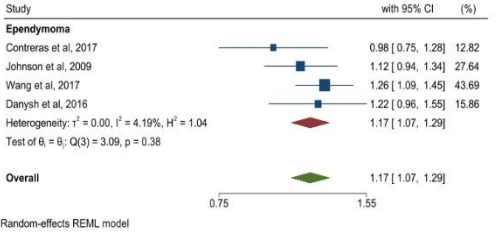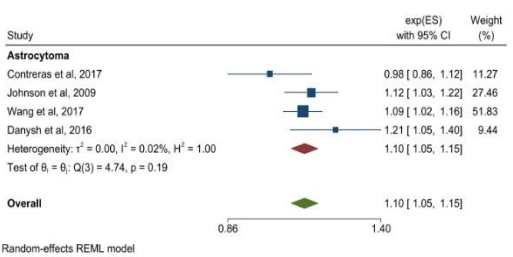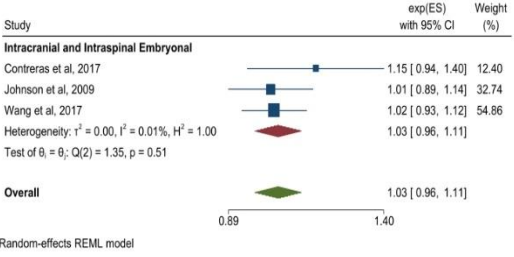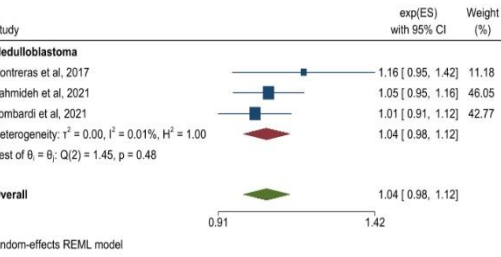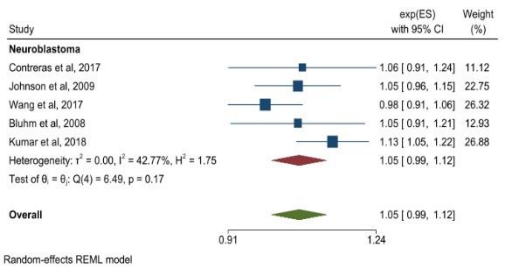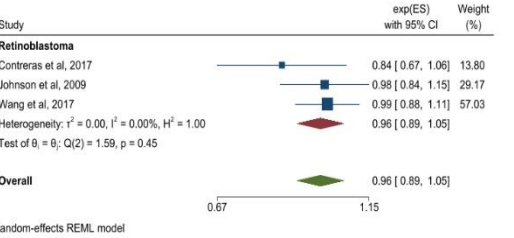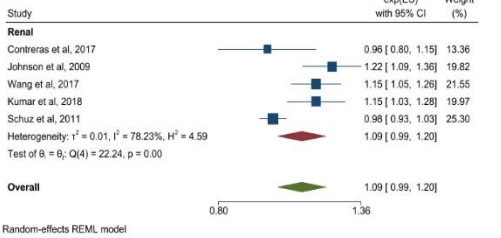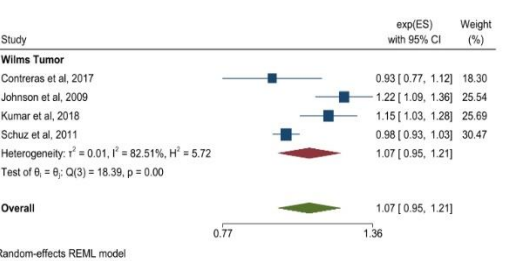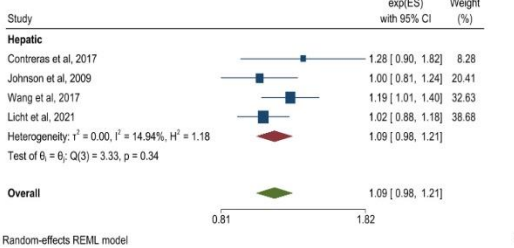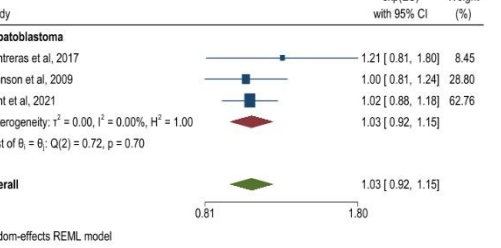

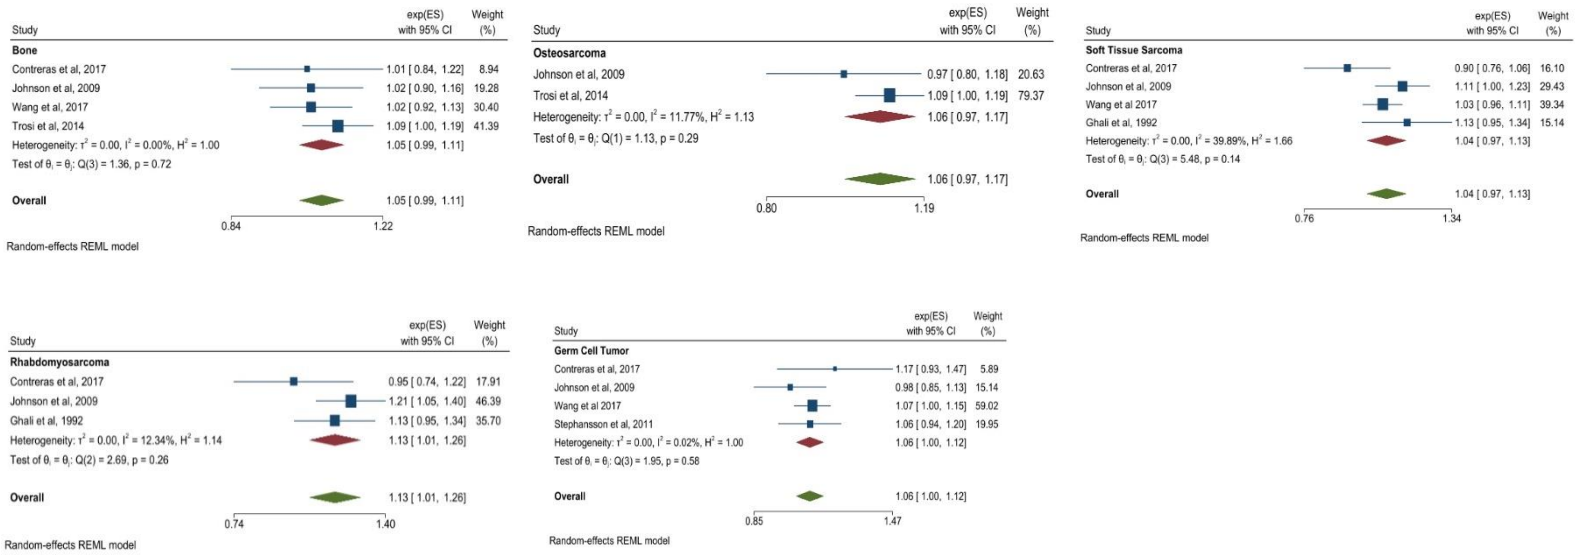

**Supplementary Figure 1.** Maternal meta-analysis results for a five-year increase in maternal age at birth by cancer type. Error bars represent 95% confidence intervals. Between study heterogeneity is presented in terms of the  $\tau^2$ ,  $I^2$ , and  $H^2$  statistic. Test of  $\theta_i = \theta_j$  refers to the Cochran's Q test of between study homogeneity. Random effects modeling using restricted maximum likelihood methods was used to produce summary estimates. All tests were two-sided. CI = confidence interval; ES = estimate ( $\beta$ ); REML = restricted maximum likelihood.

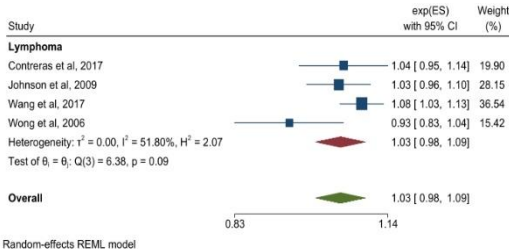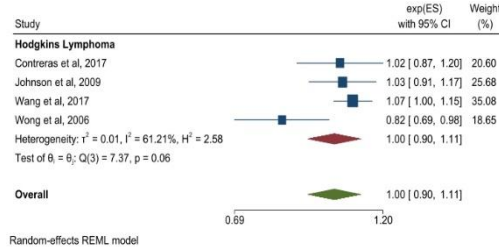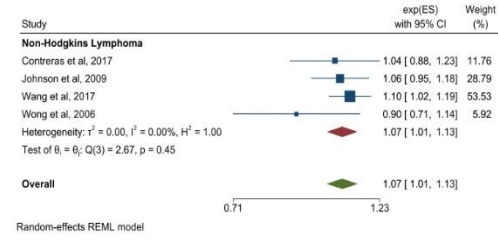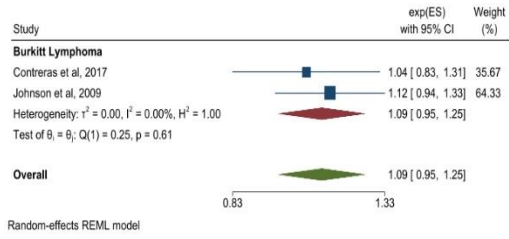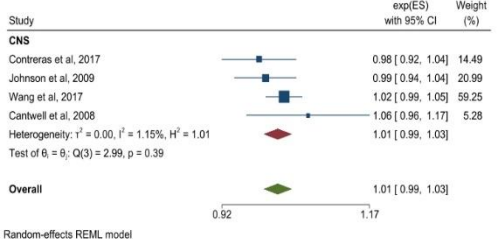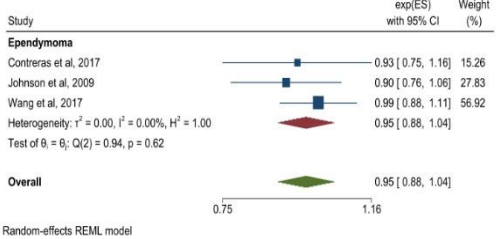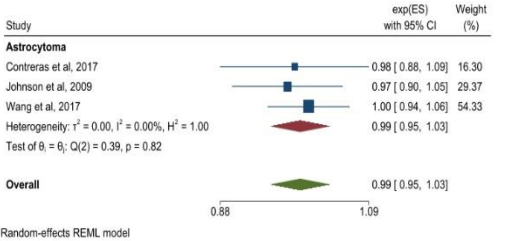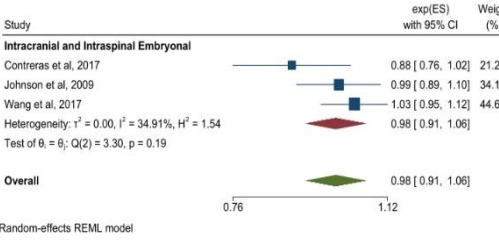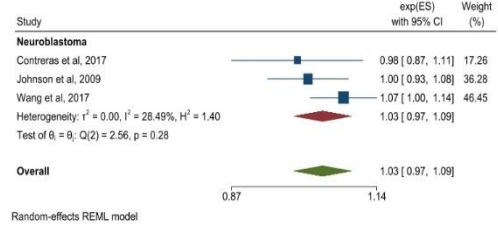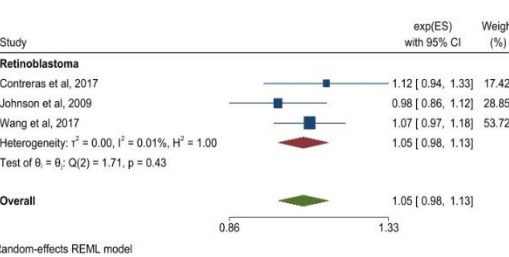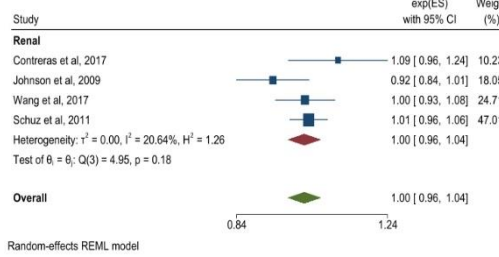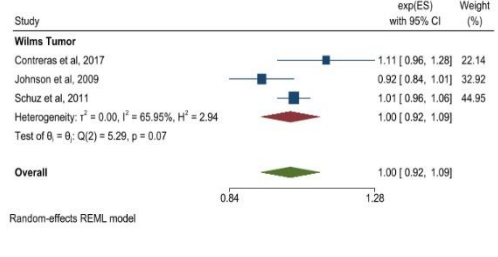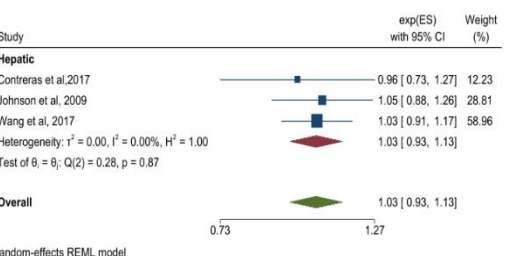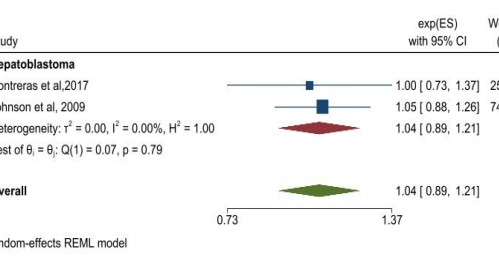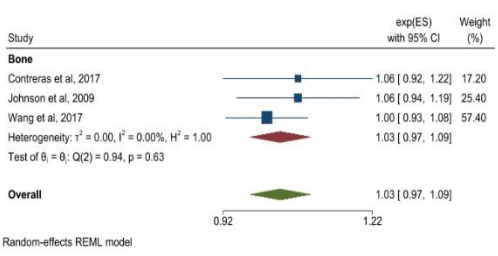

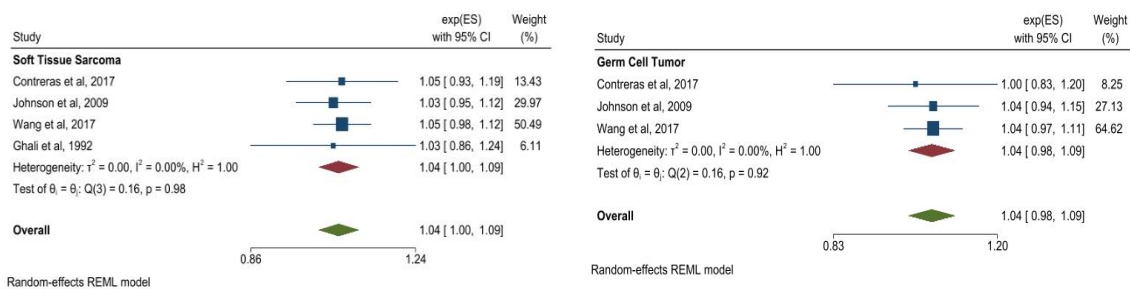

**Supplementary Figure 2.** Paternal meta-analysis results for a five-year increase in paternal age at birth by cancer type. Error bars represent 95% confidence intervals. Between study heterogeneity is presented in terms of the  $\tau^2$ ,  $I^2$ , and  $H^2$  statistic. Test of  $\theta_i = \theta_j$  refers to the Cochran's Q test of between study homogeneity. Random effects modeling using restricted maximum likelihood methods was used to produce summary estimates. All tests were two-sided. CI = confidence interval; ES = estimate ( $\beta$ ); REML = restricted maximum likelihood.
